# Supplementary material for: Tansy (Tanacetum vulgare L.)—A Wild-Growing Aromatic Medicinal Plant with a Variable Essential Oil Composition
Source: MDPI journal article supplement (doi:10.3390/agronomy12020277), 2022-01-21
Supplement: s1 [file s1]

## Supplementary Materials

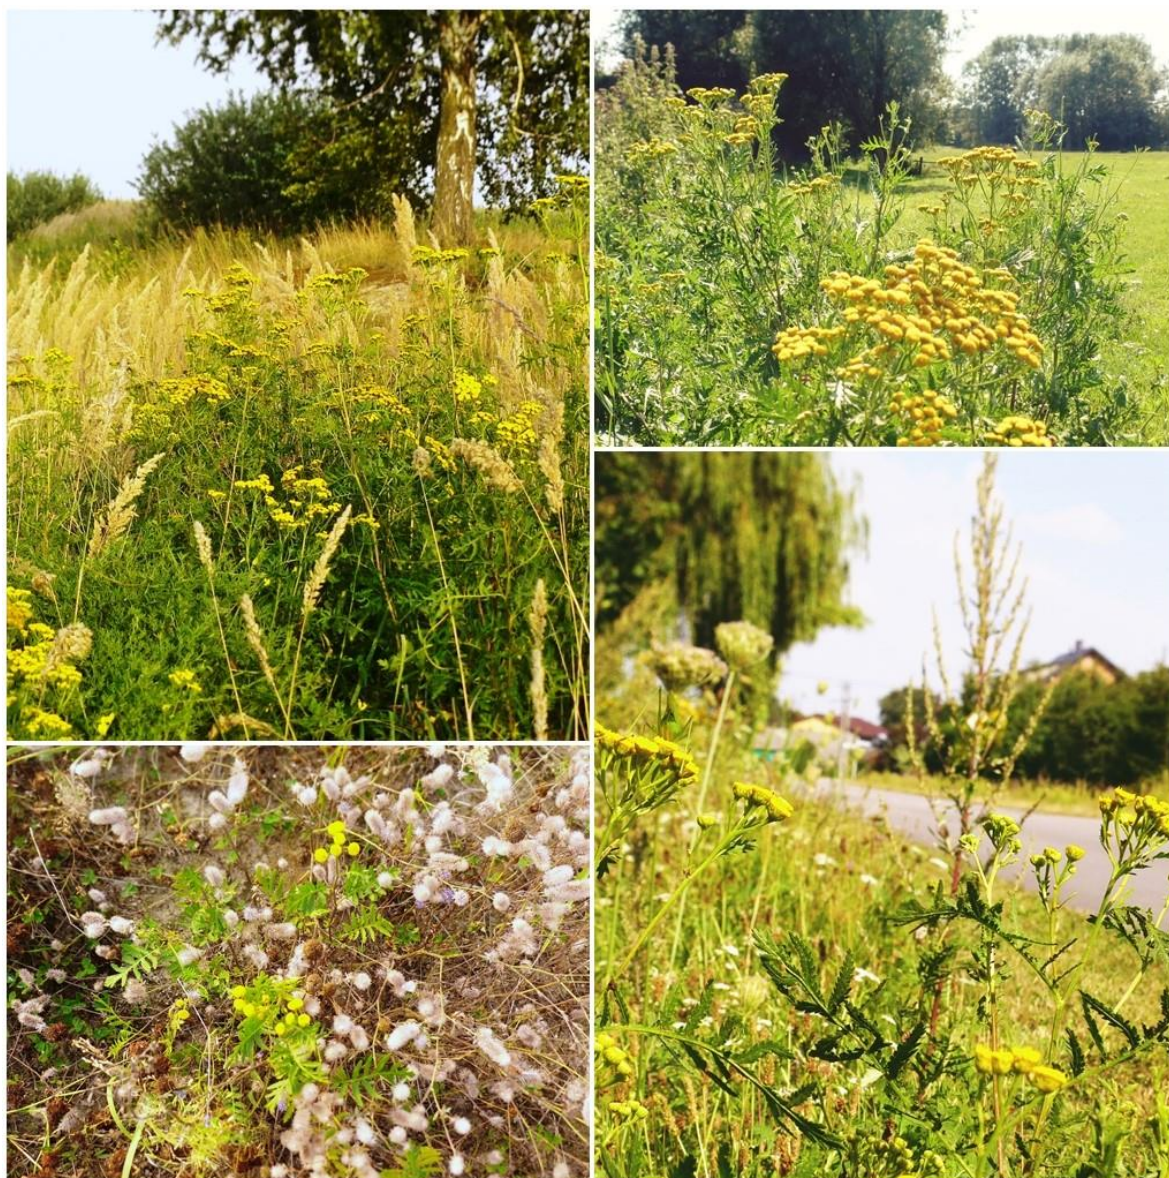

**Figure S1.** Natural sites of tansy, from above and from left to right: R, M, W, T (explanation in Table 1).



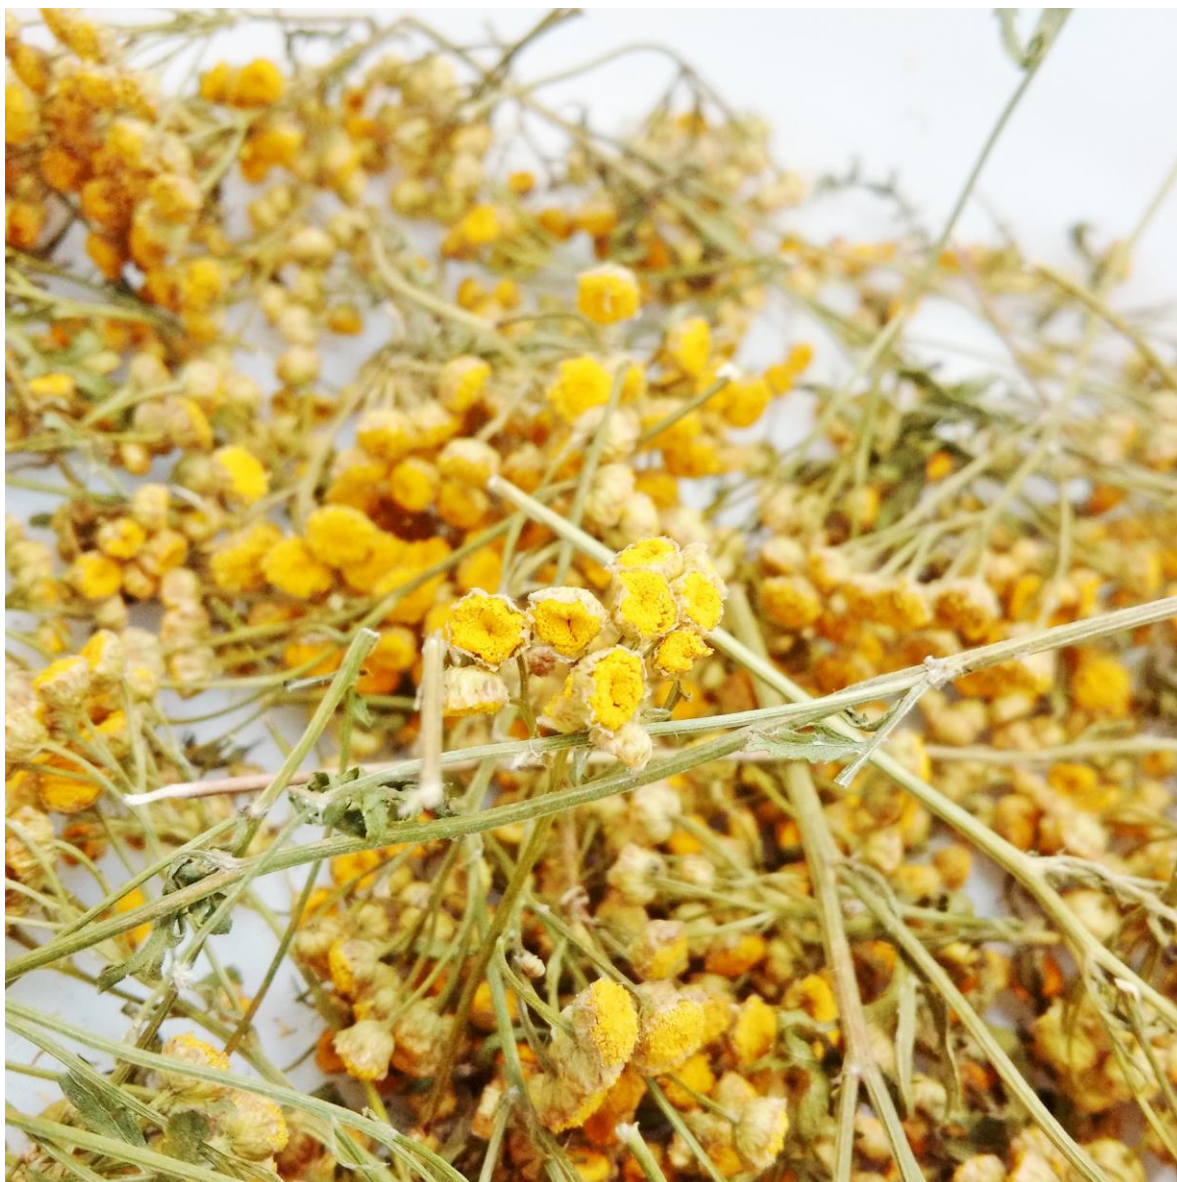

**Figure S2.** Dried tansy raw material (*Tanacetum* inflorescences).

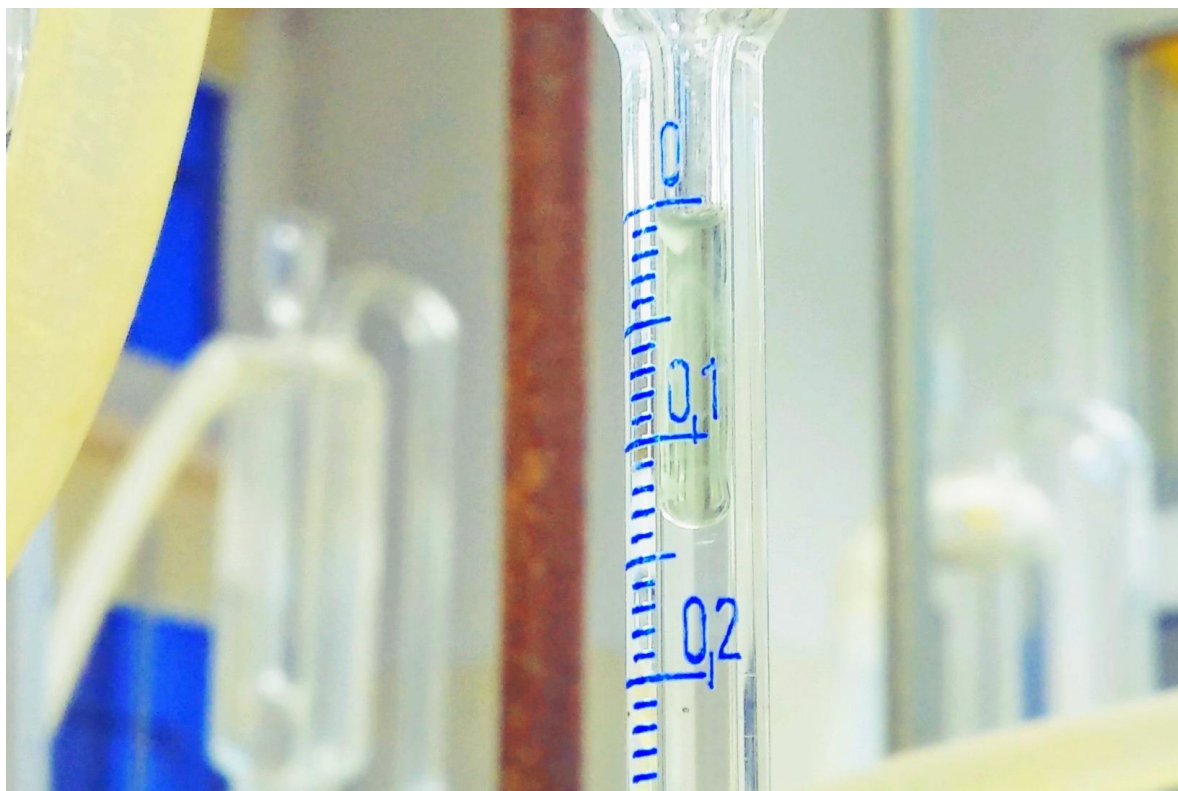

**Figure S3.** Tansy essential oil (*Tanacetum officinale*).
